# Supplementary material
Source: ML conference proceedings conference paper supplement (https://openreview.net/forum?id=hGl8rsmNXzs)
Supplement: supplementary_material [file 2.2_OD_datasets_results_neurips.xlsx]

## Sheet: Sheet1
	License	Created Minival?	Custom Caption	In GLIPv1?	Total number of classes	# of classes not in Test	# of classes in csv	# of -1 in csv	glipT_fullmodel	glipT_b_linear	glipT_e_prompt	dyheadT_fullmodel	dyheadT_b_linear	dyheadT_e_cosine
AerialMaritimeDrone_large	MIT https://choosealicense.com/licenses/mit/			Y	5		5	0	231455576	198919	9216	42017883	2570	2571
AerialMaritimeDrone_tiled	MIT https://choosealicense.com/licenses/mit/				5		5	0	231455576	198919	9216	42017883	2570	2571
AmericanSignLanguageLetters_American_Sign_Language_Letters.v1-v1.coco	cc https://creativecommons.org/publicdomain/zero/1.0/				26	2	26	2	231455576	198919	40704	42023280	7967	7968
Aquarium_Aquarium_Combined.v2-raw-1024.coco	cc https://creativecommons.org/licenses/by/4.0/		Y	Y	7		7	0	231455576	198919	26112	42018397	3084	3085
BCCD_BCCD.v3-raw.coco	MIT https://choosealicense.com/licenses/mit/				3		3	0	231455576	198919	7680	42017369	2056	2057
ChessPieces_Chess_Pieces.v23-raw.coco	cc https://creativecommons.org/publicdomain/zero/1.0/				13	1	13	1	231455576	198919	29184	42019939	4626	4627
CottontailRabbits	cc https://creativecommons.org/publicdomain/zero/1.0/		Y	Y	1		1	0	231455576	198919	2304	42016855	1542	1543
DroneControl_Drone_Control.v3-raw.coco	cc https://creativecommons.org/publicdomain/zero/1.0/				8	1	8	1	231455576	198919	16128	42018654	3341	3342
EgoHands_generic	cc https://creativecommons.org/licenses/by/4.0/		Y	Y	1		1	0	231455576	198919	4608	42016855	1542	1543
EgoHands_specific	cc https://creativecommons.org/licenses/by/4.0/				4		4	0	231455576	198919	11520	42017626	2313	2314
HardHatWorkers_raw	cc https://creativecommons.org/publicdomain/zero/1.0/				3		3	0	231455576	198919	5376	42017369	2056	2057
MaskWearing_raw	cc https://creativecommons.org/publicdomain/zero/1.0/				2		2	0	231455576	198919	5376	42017112	1799	1800
MountainDewCommercial	cc https://creativecommons.org/licenses/by/4.0/				1		1	0	231455576	198919	2304	42016855	1542	1543
NorthAmericaMushrooms_North_American_Mushrooms.v1-416x416.coco	cc https://creativecommons.org/publicdomain/zero/1.0/		Y	Y	2		2	0	231455576	198919	5376	42017112	1799	1800
OxfordPets_by-breed	cc https://creativecommons.org/licenses/by/4.0/				37		37	0	231455576	198919	158208	42026107	10794	10795
OxfordPets_by-species	cc https://creativecommons.org/licenses/by/4.0/				2		2	0	231455576	198919	3840	42017112	1799	1800
PKLot_640	cc https://creativecommons.org/licenses/by/4.0/				2		2	0	231455576	198919	6912	42017112	1799	1800
Packages_Raw	cc https://creativecommons.org/publicdomain/zero/1.0/		Y	Y	1		1	0	231455576	198919	6912	42016855	1542	1543
PascalVOC	cc https://creativecommons.org/licenses/by/4.0/			Y	20		20	0	231455576	198919	38400	42021738	6425	6426
Raccoon_Raccoon.v2-raw.coco	MIT https://choosealicense.com/licenses/mit/			Y	1		1	0	231455576	198919	3840	42016855	1542	1543
ShellfishOpenImages_raw	cc https://creativecommons.org/licenses/by/4.0/			Y	3		3	0	231455576	198919	5376	42017369	2056	2057
ThermalCheetah	cc https://creativecommons.org/licenses/by/4.0/				2		2	0	231455576	198919	5376	42017112	1799	1800
UnoCards_raw	MIT https://choosealicense.com/licenses/mit/				15		15	0	231455576	198919	23808	42020453	5140	5141
VehiclesOpenImages_416x416	cc https://creativecommons.org/licenses/by/4.0/			Y	5		5	0	231455576	198919	8448	42017883	2570	2571
WildfireSmoke	https://creativecommons.org/licenses/by-nc-sa/4.0/ (No commercial)				1		1	0	231455576	198919	2304	42016855	1542	1543
boggleBoards_416x416AutoOrient_export_	cc https://creativecommons.org/publicdomain/zero/1.0/				36	5	36	5	231455576	198919	56832	42025850	10537	10538
brackishUnderwater_960x540	cc https://creativecommons.org/licenses/by/4.0/				6		6	0	231455576	198919	12288	42018140	2827	2828
dice_mediumColor_export	cc https://creativecommons.org/publicdomain/zero/1.0/				6		6	0	231455576	198919	9984	42018140	2827	2828
openPoetryVision_512x512	cc https://creativecommons.org/licenses/by/4.0/				43		43	0	231455576	198919	110592	42027649	12336	12337
pistols_export	cc https://creativecommons.org/publicdomain/zero/1.0/				1		1	0	231455576	198919	2304	42016855	1542	1543
plantdoc_416x416	cc https://creativecommons.org/licenses/by/4.0/				30	3	30	3	231455576	198919	109056	42024308	8995	8996
pothole	https://opendatacommons.org/licenses/odbl/1-0/		Y	Y	1		1	0	231455576	198919	6912	42016855	1542	1543
selfdrivingCar_fixedLarge_export_	MIT https://choosealicense.com/licenses/mit/				11		11	0	231455576	198919	36864	42019425	4112	4113
thermalDogsAndPeople	cc https://creativecommons.org/publicdomain/zero/1.0/			Y	2		2	0	231455576	198919	3840	42017112	1799	1800
websiteScreenshots	MIT https://choosealicense.com/licenses/mit/				8		8	8	231455576	198919	14592	42018654	3341	3342
									231455576	198919	22908.3	4.20189e+07	3590.66	3591.66
Not used
selfdrivingCar_fixedSmall_export (large res version available)
syntheticFruit (Too synthetic)
plantdoc_100x100 (large res version available)

## Sheet: Sheet2
	glip-T prompt 10-shot	GLIP-T Zero-Shot
AerialMaritimeDronelarge	& 19.4\std{2.0}	& 13.7\std{0.0}
AmericanSignLanguageLettersAmerican Sign Language Letters.v1-v1.coco	& 20.8\std{11.0}	& 2.5
AquariumAquarium Combined.v2-raw-1024.coco	& 41.3\std{1.5}	& 18.3
BCCDBCCD.v3-raw.coco	& 40.1\std{17.9}	& 1.0\std{0.0}
ChessPiecesChess Pieces.v23-raw.coco	& 62.9\std{0.7}	& 10.0
CottontailRabbitsvalid	& 70.2\std{2.6}	& 69.7
DroneControlDrone Control.v3-raw.coco	& 28.3\std{0.5}	& 5.1
EgoHandsgeneric	& 65.1\std{0.4}	& 50.0
EgoHandsspecific	& 37.0\std{5.6}	& 0.8
HardHatWorkersraw	& 40.3\std{0.8}	& 3.0
MaskWearingraw	& 38.5\std{2.6}	& 1.1
MountainDewCommercialvalid	& 22.9\std{1.8}	& 21.6\std{0.0}
NorthAmericaMushroomsNorth American Mushrooms.v1-416x416.coco	& 85.4\std{0.6}	& 75.1
OxfordPetsby-breed	& 45.4\std{0.8}	& 0.4
OxfordPetsby-species	& 58.6\std{12.5}	& 1.1
PKLot640	& 18.2\std{10.5}	& 0.0
PackagesRaw	& 69.9\std{0.6}	& 72.3
PascalVOCvalid	& 57.2\std{1.6}	& 56.1
RaccoonRaccoon.v2-raw.coco	& 60.2\std{1.3}	& 57.8\std{0.0}
ShellfishOpenImagesraw	& 34.8\std{2.9}	& 25.9\std{0.0}
ThermalCheetahvalid	& 47.0\std{2.7}	& 2.7
UnoCardsraw	& 41.9\std{3.3}	& 0.2
VehiclesOpenImages416x416	& 62.5\std{0.6}	& 56.0
WildfireSmokevalid	& 33.9\std{4.6}	& 2.3
boggleBoards416x416AutoOrient	& 28.6\std{0.8}	& 0.0
brackishUnderwater960x540	& 24.5\std{3.4}	& 3.7\std{0.0}
dicemediumColor	& 13.2\std{2.2}	& 1.1
openPoetryVision512x512	& 2.1\std{0.3}	& 0.0
pistolsexport	& 52.0\std{5.9}	& 49.8
plantdoc416x416	& 7.2\std{2.9}	& 1.1
potholevalid	& 29.1\std{2.0}	& 17.2
selfdrivingCarfixedLarge	& 20.9\std{1.5}	& 8.0
thermalDogsAndPeoplevalid	& 61.8\std{0.5}	& 43.7
websiteScreenshotsvalid	& 6.4\std{0.4}	& 0.5
AVG	& 39.6\std{1.2}

## Sheet: GLIP-T Results Detailed
	Linear Probe						Prompt						Full
	Shot = 1	Shot = 3	Shot = 5	Shot = 10	Shot = All		Shot = 1	Shot = 3	Shot = 5	Shot = 10	Shot = All		Shot = 1	Shot = 3	Shot = 5	Shot = 10	Shot = All
AerialMaritimeDronetiled	& 12.6\std{0.2}	& 13.0\std{0.3}	& 13.6\std{0.9}	& 15.1\std{2.5}	& 25.0		& 19.8\std{3.5}	& 18.1\std{2.0}	& 27.3\std{1.7}	& 29.2\std{1.5}	& 38.0		& 21.9\std{2.1}	& 29.4\std{1.6}	& 31.5\std{1.5}	& 35.3\std{1.3}	& 40.5
AerialMaritimeDronelarge	& 12.7\std{0.5}	& 13.6\std{0.7}	& 13.4\std{1.0}	& 14.2\std{0.3}	& 14.6		& 18.2\std{3.6}	& 19.0\std{3.2}	& 18.9\std{2.3}	& 19.4\std{2.0}	& 23.5		& 20.8\std{2.8}	& 22.0\std{0.9}	& 25.9\std{1.6}	& 26.4\std{1.9}	& 29.4
AmericanSignLanguageLettersAmerican Sign Language Letters.v1-v1.coco	& 3.6\std{0.3}	& 5.4\std{1.4}	& 4.8\std{1.1}	& 6.8\std{0.2}	& 8.6		& 12.4\std{1.4}	& 32.9\std{3.0}	& 25.6\std{1.8}	& 30.9\std{11.9}	& 59.3		& 10.1\std{2.2}	& 22.8\std{11.2}	& 27.8\std{14.5}	& 52.6\std{3.1}	& 76.3
AquariumAquarium Combined.v2-raw-1024.coco	& 18.5\std{2.5}	& 20.5\std{2.9}	& 23.1\std{2.6}	& 22.3\std{1.3}	& 35.6		& 26.9\std{3.1}	& 46.6\std{1.2}	& 36.9\std{1.5}	& 41.3\std{1.5}	& 51.3		& 28.2\std{2.2}	& 35.3\std{1.8}	& 38.2\std{0.3}	& 45.6\std{0.3}	& 53.2
BCCDBCCD.v3-raw.coco	& 9.9\std{1.1}	& 12.3\std{1.9}	& 10.6\std{2.2}	& 13.3\std{0.7}	& 32.9		& 35.9\std{5.4}	& 72.8\std{2.0}	& 48.4\std{2.6}	& 40.1\std{17.9}	& 61.2		& 38.9\std{7.7}	& 50.9\std{2.3}	& 49.6\std{4.6}	& 55.2\std{1.5}	& 62.1
ChessPiecesChess Pieces.v23-raw.coco	& 19.5\std{2.2}	& 28.0\std{3.3}	& 25.7\std{1.7}	& 29.5\std{1.7}	& 46.2		& 57.1\std{7.1}	& 67.3\std{3.5}	& 73.9\std{2.0}	& 76.4\std{0.8}	& 79.5		& 65.7\std{7.9}	& 74.9\std{1.5}	& 76.9\std{0.7}	& 77.8\std{1.2}	& 80.8
CottontailRabbitsvalid	& 67.0\std{0.4}	& 66.4\std{0.5}	& 67.2\std{0.7}	& 68.1\std{0.9}	& 68.2		& 67.8\std{3.2}	& 33.9\std{1.4}	& 71.9\std{3.8}	& 70.2\std{2.6}	& 69.5		& 68.0\std{2.6}	& 67.4\std{2.1}	& 68.2\std{2.0}	& 67.8\std{2.8}	& 75.9
DroneControlDrone Control.v3-raw.coco	& 13.3\std{2.9}	& 15.0\std{1.3}	& 15.1\std{3.5}	& 17.9\std{0.7}	& 51.0		& 19.4\std{1.2}	& 62.9\std{2.0}	& 41.7\std{3.0}	& 46.6\std{0.6}	& 62.9		& 22.9\std{3.6}	& 35.7\std{2.7}	& 44.9\std{1.2}	& 45.7\std{4.2}	& 77.8
EgoHandsgeneric	& 53.8\std{2.6}	& 59.3\std{1.4}	& 58.1\std{3.5}	& 59.2\std{2.8}	& 67.4		& 55.2\std{2.5}	& 30.1\std{0.9}	& 61.7\std{2.5}	& 65.1\std{0.4}	& 72.8		& 61.4\std{2.6}	& 63.8\std{1.2}	& 65.0\std{1.4}	& 66.4\std{0.7}	& 78.8
EgoHandsspecific	& 5.8\std{1.5}	& 12.0\std{1.9}	& 9.3\std{5.8}	& 10.7\std{0.7}	& 30.4		& 18.8\std{2.9}	& 37.5\std{1.5}	& 27.1\std{7.2}	& 37.0\std{5.6}	& 65.8		& 19.6\std{5.8}	& 28.4\std{3.6}	& 36.6\std{1.6}	& 38.5\std{3.4}	& 77.8
HardHatWorkersraw	& 12.4\std{4.2}	& 15.7\std{2.8}	& 18.8\std{3.2}	& 24.0\std{1.4}	& 37.0		& 24.6\std{4.0}	& 29.0\std{1.6}	& 35.0\std{6.6}	& 40.3\std{0.8}	& 41.8		& 32.9\std{2.6}	& 38.6\std{2.2}	& 35.2\std{4.6}	& 40.3\std{0.7}	& 44.7
MaskWearingraw	& 5.7\std{3.7}	& 11.8\std{1.7}	& 12.5\std{5.3}	& 12.9\std{3.5}	& 35.3		& 24.5\std{0.7}	& 26.6\std{1.9}	& 35.3\std{5.2}	& 38.5\std{2.6}	& 48.1		& 27.5\std{0.7}	& 33.7\std{10.5}	& 37.9\std{13.0}	& 49.3\std{3.1}	& 53.9
MountainDewCommercialvalid	& 22.9\std{0.7}	& 22.5\std{0.8}	& 22.1\std{0.6}	& 21.8\std{0.5}	& 21.5		& 27.4\std{3.1}	& 82.1\std{2.0}	& 27.1\std{3.9}	& 22.9\std{1.8}	& 28.6		& 22.9\std{3.1}	& 25.7\std{3.8}	& 23.6\std{3.1}	& 24.5\std{0.8}	& 30.9
NorthAmericaMushroomsNorth American Mushrooms.v1-416x416.coco	& 75.0\std{1.2}	& 75.9\std{0.9}	& 76.4\std{1.6}	& 77.2\std{0.7}	& 77.2		& 74.1\std{3.4}	& 26.9\std{1.3}	& 81.2\std{2.9}	& 85.4\std{0.6}	& 87.4		& 72.8\std{3.2}	& 79.1\std{4.4}	& 80.9\std{4.1}	& 86.4\std{1.5}	& 88.1
OxfordPetsby-breed	& 3.9\std{0.2}	& 4.7\std{0.8}	& 4.5\std{0.8}	& 4.6\std{0.5}	& 5.4		& 16.6\std{1.3}	& 65.5\std{1.0}	& 37.0\std{1.4}	& 45.4\std{0.8}	& 67.5		& 10.7\std{1.1}	& 25.9\std{1.0}	& 33.6\std{0.5}	& 52.7\std{2.7}	& 4.2
OxfordPetsby-species	& 9.1\std{5.0}	& 13.6\std{7.8}	& 17.5\std{10.4}	& 14.2\std{10.0}	& 49.6		& 31.4\std{14.2}	& 14.0\std{11.1}	& 64.1\std{1.1}	& 58.6\std{12.5}	& 81.2		& 39.7\std{15.6}	& 64.3\std{1.4}	& 63.3\std{6.4}	& 68.0\std{4.6}	& 87.6
PKLot640	& 1.9\std{2.2}	& 4.2\std{3.1}	& 3.5\std{3.2}	& 4.0\std{2.4}	& 20.4		& 6.3\std{6.6}	& 70.6\std{1.5}	& 20.1\std{5.1}	& 18.2\std{10.5}	& 53.0		& 10.1\std{8.5}	& 28.5\std{19.1}	& 33.1\std{18.9}	& 58.1\std{2.2}	& 98.0
PackagesRaw	& 71.1\std{1.1}	& 71.9\std{2.1}	& 73.6\std{0.9}	& 72.3	& 72.3		& 68.8\std{0.8}	& 55.9\std{1.6}	& 68.6\std{1.0}	& 69.9\std{0.6}	& 67.7		& 68.8\std{3.8}	& 69.1\std{2.8}	& 68.6\std{1.1}	& 71.7\std{0.7}	& 72.7
PascalVOCvalid	& 56.7\std{0.2}	& 57.0\std{0.1}	& 57.3\std{0.3}	& 57.5\std{0.2}	& 65.1		& 53.0\std{0.5}	& 61.5\std{1.8}	& 57.7\std{0.7}	& 57.2\std{1.6}	& 67.4		& 55.7\std{1.4}	& 53.6\std{1.8}	& 57.1\std{2.0}	& 58.0\std{1.6}	& 60.0
RaccoonRaccoon.v2-raw.coco	& 56.2\std{3.0}	& 60.8\std{2.9}	& 60.6\std{1.9}	& 63.0\std{1.1}	& 63.5		& 58.8\std{2.1}	& 28.8\std{4.3}	& 60.3\std{2.7}	& 60.2\std{1.3}	& 65.6		& 55.1\std{4.7}	& 57.9\std{0.7}	& 62.8\std{4.7}	& 61.9\std{2.2}	& 59.4
ShellfishOpenImagesraw	& 25.6\std{0.3}	& 25.2\std{1.5}	& 27.2\std{1.6}	& 26.5\std{0.9}	& 30.2		& 22.2\std{3.5}	& 32.5\std{10.7}	& 32.9\std{3.8}	& 34.8\std{2.9}	& 47.0		& 20.0\std{3.0}	& 21.9\std{3.0}	& 31.4\std{4.4}	& 35.4\std{2.5}	& 45.0
ThermalCheetahvalid	& 13.4\std{6.0}	& 17.8\std{4.9}	& 24.2\std{2.1}	& 22.4\std{6.9}	& 33.2		& 25.1\std{5.6}	& 20.2\std{1.7}	& 46.8\std{13.4}	& 47.0\std{2.7}	& 51.1		& 41.6\std{8.7}	& 51.3\std{2.1}	& 47.5\std{2.5}	& 60.7\std{2.3}	& 58.5
UnoCardsraw	& 4.1\std{0.2}	& 4.6\std{0.3}	& 4.3\std{0.3}	& 4.5\std{0.5}	& 22.5		& 8.2\std{0.9}	& 52.5\std{3.6}	& 25.4\std{4.9}	& 41.9\std{3.3}	& 76.1		& 12.0\std{1.1}	& 32.1\std{1.7}	& 44.0\std{3.8}	& 65.6\std{7.3}	& 89.9
VehiclesOpenImages416x416	& 56.5\std{0.5}	& 58.4\std{1.5}	& 59.7\std{2.4}	& 60.1\std{2.8}	& 65.4		& 54.7\std{1.0}	& 19.5\std{6.4}	& 57.3\std{1.9}	& 62.5\std{0.6}	& 66.2		& 57.6\std{3.2}	& 56.3\std{0.9}	& 59.8\std{1.8}	& 61.7\std{1.6}	& 63.7
WildfireSmokevalid	& 2.7\std{0.4}	& 4.8\std{2.6}	& 7.4\std{3.7}	& 6.5\std{2.9}	& 23.2		& 15.6\std{1.0}	& 42.7\std{2.9}	& 18.0\std{11.3}	& 33.9\std{4.6}	& 47.9		& 20.5\std{3.9}	& 24.9\std{5.2}	& 27.5\std{6.3}	& 33.2\std{2.3}	& 56.7
boggleBoards416x416AutoOrient	& 0.8\std{0.2}	& 1.0\std{0.1}	& 0.8\std{0.1}	& 0.7\std{0.0}	& 1.7		& 31.3\std{4.8}	& 13.4\std{5.3}	& 48.2\std{2.1}	& 49.4\std{0.9}	& 53.2		& 38.7\std{3.8}	& 58.0\std{0.4}	& 63.2\std{0.3}	& 69.2\std{1.8}	& 75.2
brackishUnderwater960x540	& 6.6\std{0.8}	& 9.5\std{0.5}	& 9.5\std{1.0}	& 11.5\std{1.9}	& 20.0		& 7.7\std{3.0}	& 7.8\std{2.2}	& 15.5\std{3.8}	& 24.5\std{3.4}	& 41.9		& 11.1\std{1.1}	& 22.5\std{1.5}	& 25.7\std{1.3}	& 32.9\std{2.6}	& 79.5
dicemediumColor	& 3.7\std{1.1}	& 3.8\std{1.9}	& 4.3\std{0.8}	& 5.0\std{0.4}	& 6.4		& 5.9\std{1.5}	& 1.9\std{0.4}	& 11.5\std{2.6}	& 13.2\std{2.2}	& 42.0		& 8.4\std{4.4}	& 12.1\std{2.9}	& 17.5\std{5.0}	& 24.9\std{3.5}	& 76.5
openPoetryVision512x512	& 0.1\std{0.0}	& 0.1\std{0.0}	& 0.1\std{0.0}	& 0.1\std{0.0}	& 0.4		& 1.4\std{0.2}	& 49.1\std{2.3}	& 2.1\std{0.0}	& 2.1\std{0.3}	& 2.5		& 1.9\std{0.2}	& 3.4\std{0.4}	& 4.6\std{0.2}	& 8.7\std{0.8}	& 58.7
pistolsexport	& 41.5\std{4.8}	& 48.6\std{0.9}	& 51.4\std{2.0}	& 51.2\std{1.6}	& 63.4		& 46.0\std{4.0}	& 12.0\std{0.8}	& 49.2\std{4.5}	& 52.0\std{5.9}	& 69.5		& 47.1\std{2.6}	& 45.6\std{5.6}	& 50.2\std{5.7}	& 57.5\std{3.6}	& 71.9
plantdoc416x416	& 3.6\std{0.7}	& 4.3\std{0.3}	& 4.4\std{0.5}	& 4.5\std{0.2}	& 9.6		& 6.1\std{1.4}	& 27.0\std{0.9}	& 12.7\std{2.2}	& 19.1\std{3.2}	& 32.0		& 6.6\std{1.1}	& 13.8\std{0.2}	& 18.7\std{2.2}	& 28.5\std{3.3}	& 45.1
potholevalid	& 16.7\std{0.4}	& 18.0\std{1.4}	& 17.6\std{0.3}	& 18.4\std{0.8}	& 30.2		& 20.3\std{2.2}	& 15.3\std{1.0}	& 27.9\std{3.0}	& 29.1\std{2.0}	& 50.8		& 19.4\std{5.9}	& 26.0\std{3.4}	& 28.5\std{1.6}	& 31.9\std{1.1}	& 57.1
selfdrivingCarfixedLarge	& 10.1\std{0.3}	& 10.6\std{0.4}	& 11.0\std{0.7}	& 10.4\std{1.2}	& 18.3		& 11.5\std{1.1}	& 60.9\std{7.8}	& 18.3\std{1.7}	& 20.9\std{1.5}	& 26.8		& 12.6\std{0.8}	& 16.6\std{0.7}	& 18.6\std{1.8}	& 23.6\std{2.0}	& 49.5
thermalDogsAndPeoplevalid	& 50.8\std{7.3}	& 53.2\std{3.6}	& 56.4\std{3.9}	& 54.0\std{5.9}	& 67.3		& 53.8\std{4.7}	& 5.1\std{0.7}	& 61.9\std{5.8}	& 61.8\std{0.5}	& 76.0		& 61.2\std{4.4}	& 62.2\std{5.6}	& 68.0\std{2.2}	& 76.4\std{4.1}	& 83.5
websiteScreenshotsvalid	& 0.6\std{0.1}	& 0.7\std{0.0}	& 0.6\std{0.0}	& 0.8\std{0.2}	& 3.7		& 4.2\std{1.0}		& 5.0\std{1.0}	& 6.4\std{0.4}	& 11.5		& 3.9\std{0.4}	& 7.0\std{0.3}	& 8.8\std{1.5}	& 11.7\std{1.0}	& 27.0

## Sheet: DyHead Results Detailed
	Linear Probe							Full
	Shot = 1	Shot = 3	Shot = 5	Shot = 10	Shot = All			Shot = 1	Shot = 3	Shot = 5	Shot = 10	Shot = All
AerialMaritimeDronetiled	& 14.4\std{3.4}	& 21.8\std{1.1}	& 20.5\std{2.4}	& 22.0\std{1.9}	& 25.6			& 16.6\std{3.3}	& 24.0\std{3.6}	& 25.3\std{2.9}	& 31.7\std{1.5}	& 39.7
AerialMaritimeDronelarge	& 9.1\std{5.2}	& 11.8\std{2.5}	& 5.9\std{5.7}	& 9.5\std{3.5}	& 19.6			& 14.6\std{2.4}	& 18.7\std{3.7}	& 19.3\std{2.1}	& 26.6\std{2.5}	& 28.9
AmericanSignLanguageLettersAmerican Sign Language Letters.v1-v1.coco	& 10.4\std{1.5}	& 13.6\std{1.5}	& 14.2\std{0.4}	& 17.5\std{1.9}	& 20.4			& 30.1\std{1.6}	& 50.9\std{2.0}	& 58.7\std{1.5}	& 69.3\std{1.3}	& 79.7
AquariumAquarium Combined.v2-raw-1024.coco	& 13.6\std{0.2}	& 18.6\std{4.8}	& 21.6\std{1.3}	& 23.8\std{1.4}	& 32.7			& 13.5\std{5.0}	& 27.3\std{3.4}	& 29.2\std{2.8}	& 38.2\std{1.5}	& 51.7
BCCDBCCD.v3-raw.coco	& 3.3\std{3.2}	& 6.8\std{3.2}	& 10.9\std{6.9}	& 5.9\std{3.9}	& 36.7			& 31.4\std{6.2}	& 49.6\std{2.6}	& 50.4\std{3.1}	& 54.2\std{1.3}	& 61.6
ChessPiecesChess Pieces.v23-raw.coco	& 26.7\std{12.5}	& 38.2\std{15.3}	& 51.1\std{3.3}	& 37.1\std{16.4}	& 65.8			& 61.5\std{6.0}	& 73.3\std{0.9}	& 76.6\std{0.6}	& 76.4\std{1.5}	& 79.4
CottontailRabbitsvalid	& 62.3\std{1.5}	& 63.8\std{4.0}	& 55.1\std{16.8}	& 59.9\std{4.4}	& 68.9			& 59.3\std{4.6}	& 63.6\std{1.6}	& 57.8\std{7.8}	& 58.3\std{9.8}	& 71.6
DroneControlDrone Control.v3-raw.coco	& 13.8\std{4.5}	& 11.7\std{1.8}	& 17.0\std{7.6}	& 13.2\std{1.4}	& 41.0			& 24.1\std{4.3}	& 38.6\std{1.4}	& 40.2\std{4.4}	& 50.0\std{1.6}	& 77.8
EgoHandsgeneric	& 9.1\std{2.1}	& 12.2\std{3.7}	& 8.0\std{4.1}	& 9.0\std{7.8}	& 37.2			& 43.4\std{4.6}	& 52.7\std{4.7}	& 54.1\std{1.4}	& 58.9\std{3.2}	& 77.6
EgoHandsspecific	& 3.9\std{1.2}	& 7.0\std{1.1}	& 5.2\std{1.4}	& 9.3\std{2.2}	& 25.6			& 20.2\std{3.4}	& 29.6\std{5.3}	& 30.0\std{3.5}	& 36.8\std{2.6}	& 76.7
HardHatWorkersraw	& 12.4\std{0.6}	& 14.9\std{0.1}	& 16.1\std{1.4}	& 16.5\std{1.7}	& 34.1			& 25.0\std{4.6}	& 33.4\std{4.8}	& 36.4\std{2.4}	& 38.4\std{1.3}	& 43.4
MaskWearingraw	& 5.8\std{2.5}	& 6.1\std{3.4}	& 8.3\std{8.3}	& 2.0\std{0.2}	& 35.2			& 23.6\std{4.3}	& 40.9\std{3.8}	& 37.6\std{5.6}	& 42.1\std{0.4}	& 57.8
MountainDewCommercialvalid	& 13.9\std{6.4}	& 9.0\std{7.3}	& 10.9\std{7.0}	& 11.2\std{6.6}	& 7.7			& 18.4\std{5.5}	& 18.5\std{3.0}	& 16.9\std{3.8}	& 17.2\std{7.0}	& 26.5
NorthAmericaMushroomsNorth American Mushrooms.v1-416x416.coco	& 44.5\std{14.1}	& 54.8\std{12.5}	& 49.0\std{8.7}	& 65.6\std{6.9}	& 70.5			& 59.0\std{8.0}	& 77.5\std{2.1}	& 78.7\std{6.9}	& 85.1\std{2.2}	& 85.9
OxfordPetsby-breed	& 3.3\std{0.4}	& 6.0\std{0.8}	& 7.6\std{0.5}	& 8.1\std{0.9}	& 14.8			& 16.8\std{1.4}	& 35.7\std{1.9}	& 45.7\std{3.7}	& 56.4\std{3.1}	& 78.2
OxfordPetsby-species	& 3.0\std{1.8}	& 7.5\std{1.0}	& 10.1\std{5.5}	& 3.7\std{1.7}	& 39.6			& 27.8\std{14.4}	& 46.8\std{3.7}	& 56.6\std{3.4}	& 54.4\std{6.5}	& 84.3
PKLot640	& 2.2\std{2.3}	& 0.3\std{0.3}	& 3.0\std{1.2}	& 0.9\std{0.7}	& 21.5			& 17.8\std{3.2}	& 36.7\std{5.0}	& 31.7\std{11.3}	& 53.1\std{3.7}	& 97.9
PackagesRaw	& 60.5\std{0.5}	& 58.0\std{15.5}	& 70.6\std{2.6}	& 69.5\std{2.5}	& 37.6			& 59.9\std{0.5}	& 67.5\std{4.3}	& 62.6\std{3.2}	& 50.3\std{6.4}	& 69.7
PascalVOCvalid	& 43.3\std{2.6}	& 53.8\std{0.7}	& 55.5\std{0.3}	& 55.7\std{1.3}	& 63.0			& 26.9\std{2.1}	& 40.8\std{1.0}	& 43.6\std{0.7}	& 45.5\std{0.5}	& 52.2
RaccoonRaccoon.v2-raw.coco	& 47.9\std{7.4}	& 60.5\std{3.6}	& 62.4\std{3.4}	& 62.4\std{1.5}	& 66.7			& 46.3\std{8.8}	& 45.1\std{4.4}	& 52.4\std{0.6}	& 46.1\std{1.2}	& 55.7
ShellfishOpenImagesraw	& 10.3\std{5.5}	& 16.4\std{1.7}	& 19.2\std{1.1}	& 22.1\std{1.5}	& 27.0			& 13.1\std{4.0}	& 20.1\std{1.3}	& 24.4\std{1.8}	& 26.5\std{4.1}	& 41.9
ThermalCheetahvalid	& 11.8\std{3.7}	& 22.1\std{1.5}	& 16.6\std{7.9}	& 25.2\std{3.7}	& 29.4			& 29.6\std{12.2}	& 44.1\std{6.2}	& 52.9\std{3.4}	& 53.1\std{3.1}	& 57.1
UnoCardsraw	& 2.1\std{0.6}	& 4.6\std{2.5}	& 4.1\std{1.7}	& 6.3\std{0.7}	& 19.6			& 26.8\std{2.1}	& 59.2\std{1.7}	& 70.3\std{2.0}	& 76.6\std{0.6}	& 89.5
VehiclesOpenImages416x416	& 36.3\std{2.1}	& 47.1\std{2.5}	& 47.4\std{2.6}	& 48.6\std{5.6}	& 60.5			& 31.1\std{5.1}	& 50.1\std{0.9}	& 47.8\std{3.3}	& 52.1\std{3.0}	& 57.0
WildfireSmokevalid	& 0.5\std{0.6}	& 0.2\std{0.2}	& 0.2\std{0.1}	& 0.3\std{0.3}	& 3.6			& 12.4\std{2.0}	& 13.3\std{4.6}	& 16.8\std{3.1}	& 24.0\std{8.3}	& 54.6
boggleBoards416x416AutoOrient	& 1.1\std{0.2}	& 1.0\std{0.0}	& 0.9\std{0.3}	& 1.0\std{0.1}	& 1.0			& 41.9\std{2.9}	& 62.6\std{1.9}	& 68.8\std{0.4}	& 70.8\std{1.5}	& 77.4
brackishUnderwater960x540	& 1.3\std{0.6}	& 6.2\std{2.9}	& 6.3\std{2.4}	& 12.3\std{1.5}	& 24.5			& 9.8\std{2.5}	& 19.3\std{0.1}	& 24.0\std{2.0}	& 30.6\std{3.2}	& 75.4
dicemediumColor	& 3.9\std{0.5}	& 3.9\std{0.5}	& 5.0\std{0.7}	& 6.0\std{0.6}	& 10.3			& 7.5\std{2.0}	& 9.1\std{0.7}	& 17.0\std{5.3}	& 19.5\std{9.2}	& 72.3
openPoetryVision512x512	& 0.0\std{0.0}	& 0.0\std{0.0}	& 0.0\std{0.0}	& 0.0\std{0.0}	& 0.1			& 2.8\std{0.7}	& 5.8\std{1.3}	& 10.0\std{1.2}	& 19.9\std{2.3}	& 64.9
pistolsexport	& 7.8\std{5.6}	& 25.1\std{0.8}	& 18.3\std{8.0}	& 25.7\std{1.8}	& 47.2			& 12.7\std{4.6}	& 28.1\std{8.9}	& 30.4\std{11.4}	& 42.1\std{9.2}	& 69.3
plantdoc416x416	& 2.8\std{0.7}	& 5.0\std{0.9}	& 5.1\std{1.0}	& 6.7\std{1.6}	& 12.0			& 8.2\std{1.3}	& 17.1\std{1.9}	& 22.3\std{1.3}	& 27.4\std{0.7}	& 50.0
potholevalid	& 1.3\std{0.7}	& 6.5\std{2.3}	& 4.5\std{3.9}	& 4.0\std{2.8}	& 16.0			& 5.7\std{1.6}	& 16.8\std{4.0}	& 19.7\std{4.3}	& 23.4\std{3.2}	& 55.3
selfdrivingCarfixedLarge	& 7.9\std{2.1}	& 11.4\std{1.5}	& 12.7\std{0.4}	& 13.5\std{0.2}	& 19.3			& 9.3\std{2.2}	& 13.7\std{3.3}	& 17.9\std{2.3}	& 19.4\std{1.2}	& 47.1
thermalDogsAndPeoplevalid	& 39.3\std{9.5}	& 47.6\std{5.0}	& 49.4\std{1.9}	& 44.5\std{3.4}	& 54.8			& 35.8\std{12.1}	& 46.0\std{11.0}	& 53.0\std{12.9}	& 62.8\std{3.4}	& 79.7
websiteScreenshotsvalid	& 1.2\std{0.4}	& 1.8\std{1.0}	& 2.1\std{0.5}	& 2.1\std{0.2}	& 4.3			& 4.9\std{0.8}	& 8.6\std{0.7}	& 10.1\std{1.4}	& 11.3\std{0.7}	& 25.9

## Sheet: Sheet3
35 datasets	Linear - GLIP-T	Prompt - GLIP-T	Full - GLIP-T		Linear - DyHead O365	Full - DyHead O365		Linear - COCO	Full - DyHead COCO
1	& 22.2\std{0.1}	& 29.7\std{0.4}	& 32.2\std{0.7}		& 15.2\std{0.6}	& 25.6\std{0.4}		& 10.1\std{0.5}	& 23.5\std{0.8}
3	& 24.4\std{0.2}	& 36.5\std{0.6}	& 39.2\std{0.3}		& 19.2\std{0.9}	& 37.1\std{0.5}		& 13.8\std{0.8}	& 35.9\std{0.7}
5	& 25.1\std{0.2}	& 39.0\std{1.1}	& 42.5\std{0.9}		& 19.8\std{1.0}	& 40.1\std{1.5}		& 13.4\std{0.6}	& 38.2\std{0.7}
10	& 25.6\std{0.6}	& 41.8\std{1.2}	& 49.1\std{0.6}		& 20.6\std{1.1}	& 44.6\std{0.7}		& 14.1\std{1.0}	& 43.5\std{0.3}
Full	& 35.2\std{0.0}	& 54.4\std{0.0}	& 63.2\std{0.0}		& 31.4\std{0.0}	& 63.9\std{0.0}		& 26.1\std{0.0}	& 65.9\std{0.0}
13 datasets	Linear - GLIP-T	Prompt - GLIP-T	Full - GLIP-T		Linear - DyHead O365	Full - DyHead O365		Linear - COCO	Full - Dyhead COCO
1	& 46.3\std{0.2}	& 47.7\std{0.5}	& 48.9\std{1.3}		& 29.6\std{1.3}	& 32.4\std{1.6}		& 19.4\std{2.3}	& 30.6\std{2.2}
3	& 48.4\std{0.3}	& 51.5\std{1.3}	& 50.8\std{0.8}		& 36.6\std{0.6}	& 42.6\std{0.6}		& 28.0\std{2.1}	& 42.6\std{1.5}
5	& 49.4\std{0.3}	& 52.8\std{1.6}	& 54.2\std{1.8}		& 35.9\std{2.8}	& 44.1\std{2.4}		& 27.0\std{0.9}	& 43.9\std{0.5}
10	& 49.5\std{0.4}	& 54.5\std{0.9}	& 57.5\std{0.1}		& 38.5\std{1.0}	& 47.4\std{1.6}		& 27.1\std{2.1}	& 47.4\std{1.2}
Full	& 55.4\std{0.0}	& 62.7\std{0.0}	& 64.5\std{0.0}		& 46.3\std{0.0}	& 61.3\std{0.0}		& 38.8\std{0.0}	& 63.2\std{0.0}
