# Supplementary material
Source: ML conference proceedings conference paper supplement (https://openreview.net/forum?id=hGl8rsmNXzs)
Supplement: supplementary_material [file attachment]

## Sheet: zero_shot
Backbone	Pretrain	Dataset	Average	Caltech101	CIFAR10	CIFAR100	Country211	DTD	EuroSat	FER2013	FGVCAircraft	Food101	GTSRB	HatefulMemes	KittiDistance	MNIST	Flowers102	OxfordPets	PatchCamelyon	SST2	RESISC45	StanfordCars	VOC2007
ViT-B/32	CLIP	YFCC (15M)	32	55.9	70.2	33.7	5.1	15.6	29.9	23.3	2.5	32.2	5.6	53.5	39.9	14.3	48.7	19.1	50	49	17.3	2.3	71.6
ViT-B/32	DeCLIP	YFCC (15M)	37.9	69.1	85.3	55.6	8.8	26.3	27.5	29.8	2.9	48.6	10.4	51.7	28.4	11.1	59.8	34.9	50.6	49.9	25	4	77.5
ViT-B/32	FILIP	YFCC (15M)	34.5	65.1	83.6	50.8	7.5	23.3	23.4	23.3	3	40.8	7.4	50.8	24.2	7.9	49.5	22.5	51.8	49.9	25.9	3.1	77.1
ViT-B/32	SLIP	YFCC (15M)	31.2	58.8	69.5	39.1	5.1	14	19.5	22.8	1.3	32.8	6.7	52.9	29	10.3	45.9	24.4	50	49.9	17.5	2.2	71.6
ViT-B/32	DeCLIP	DeCLIP (88M)	51	89.2	90.9	66.8	12	44.9	39.9	23.3	9	75	11.4	53.9	39.7	13.6	83	83.7	55.3	50.1	47.6	49.7	80.6
ViT-B/32	OpenCLIP	LAION (400M)	57.5	90.1	90.8	70.6	14.8	54.5	51.7	42.4	16.6	80.9	42	52.8	31.7	37.6	65.9	86.5	50.1	52.3	57.5	79.3	82.1
ViT-B/16	OpenCLIP	LAION (400M)	59.1	90.3	90.2	70	17.4	48.7	48.6	44.9	15.4	83.2	38.6	53.4	23.9	71.1	63.7	87.6	51	57.2	63.6	81.6	82.2
ViT-L/14	OpenCLIP	LAION (400M)	62.5	92.9	93.5	76.2	21.2	56.4	53.7	50.3	20.8	89.1	45.6	55.3	28.8	63.9	70.9	89.7	50.5	57	64.1	87.4	82.3
ViT-B/32	CLIP	WebImageText (400M)	56.8	87.4	89.9	65.2	17.2	44.2	46	42	19.5	84	32.7	56	29	48.4	66.5	87.2	60.7	58.8	60	59.6	82.6
ViT-B/16	CLIP	WebImageText (400M)	60	88.9	90.8	68.2	22.8	44.8	54.7	48.5	24.3	88.7	43.5	58.1	27	52	69.4	89	54	60.9	65.6	64.8	83.7
ViT-L/14	CLIP	WebImageText (400M)	65.9	92.6	95.6	78.2	31.8	55.4	64.1	50	31.9	93.1	50.5	59.3	13.5	76.2	79.1	93.5	51.2	68.9	71	77.9	83.9
ViT-L/14 (336px)	CLIP	WebImageText (400M)	66.8	92.4	94.9	77	34.5	56	63	48.3	33.3	93.9	52.3	60	11.5	79	78.5	93.8	62.3	70.6	71.4	79.3	84
Swin-T	UniCL	ImageNet21k	27.2	58.2	83.4	52.2	0.8	9.9	13.3	15.9	1	8.7	4	48.8	25	9.7	30.9	3.3	45.2	49.9	8.4	0.8	73.8
Swin-T	K-Lite	ImageNet21k + Wiki	33.4	63.8	84.2	53.6	1.7	14.7	12.6	13.6	0.6	35.7	7.1	53.9	40.7	9.8	61.2	21.4	59.2	50.1	11.6	1.2	72.2

## Sheet: few_shot
Mode	Backbone	Pretrain	Average	Caltech101	CIFAR10	CIFAR100	Country211	DTD	EuroSat	FER2013	FGVCAircraft	Food101	GTSRB	HatefulMemes	KittiDistance	MNIST	Flowers102	OxfordPets	PatchCamelyon	SST2	RESISC45	StanfordCars	VOC2007
finetuning	ViT-B/32	CLIP	63.3	88.8	91.3	73	16.6	51.8	79.3	52.3	23.1	84	60.4	55.8	44.3	60.5	67.3	86.9	61.8	59.3	70.8	56.3	82.4
finetuning	ViT-B/32	DeCLIP	64.5	92.9	91.6	77.6	11.7	55.2	77.1	38.4	20	76.2	69.7	54.5	43.6	73.1	95.5	85.6	61.4	52	71.7	60.2	82.3
finetuning	ViT-B/32	OpenCLIP	64.8	91.6	91.6	74.1	10	54.3	72.2	46.6	23	79	82.3	54.4	33.8	85.9	83.8	86.1	62.8	53.1	76	53.7	82.2
finetuning	ViT-B/16	CLIP	69.1	91.2	92.1	73.2	22.2	53.8	79	55.9	33.5	87.5	84.3	55.3	41.9	84.9	87.1	91.7	59.4	59.8	80.1	66	83.5
finetuning	ViT-B/16	DeiT	54.1	86.2	70.1	61.5	4.4	52.9	62.5	14.5	24.1	41.9	46.7	51.1	47.6	83.8	82.7	87.8	51.5	50.1	63.4	27.7	70.9
finetuning	ViT-B/16	MAE	36.1	70.9	34.4	13.1	2.1	41.4	64.1	20.8	8.2	13.3	14.9	49.6	38	46.8	68.8	37.8	53.3	50.9	50.4	6	37.4
finetuning	ViT-B/16	MoCo-v3	39.3	73.7	70.3	17.4	2.3	45.6	60	13.5	7.2	27.6	16.5	50.8	43.6	18.1	65.7	77.1	50.9	50.7	58.2	11.2	25.7
finetuning	ViT-B/16	OpenCLIP	66.2	86.8	91.5	74.6	17	60.6	79.8	45.2	15.4	84.2	60.6	54.1	34.1	85.8	86	88.2	67.4	55	72.5	82.9	83.1
finetuning	ViT-B/16	scratch	20.9	12.5	16.2	6.6	1.3	9.5	38.3	19.9	3.2	3.2	8.6	52.4	41.7	18.6	25.4	4.7	62.3	51.1	21.7	1.8	18.3
finetuning	ViT-B/16	ViT	57.2	90.8	82.7	67.6	4.1	56	75.2	24.5	21.4	58	51.5	47.6	38.4	82.6	99.1	83.8	53.8	51	61.5	21	73.2
finetuning	Swin-T	K-Lite	48.4	81.8	87.6	68	1.8	41.6	49.3	17.9	7.9	41	16.5	55.4	38.2	79.8	86.8	52	62.9	50.7	50.3	8.8	69.9
finetuning	Swin-T	UniCL	44.8	80.2	86.2	66.7	1.3	23.1	33.1	22.5	7.6	34.9	24.7	50.9	34.7	74	87.9	35.9	60.8	49.9	40.7	7.6	72.4
linear_probe	ViT-B/32	CLIP	65.4	89.8	90	67.4	17.5	59.6	73.2	47.4	28.4	84.2	52.5	56	44.9	71.1	90.5	88	63.2	57.5	76.6	65	84
linear_probe	ViT-B/32	DeCLIP	62.5	93	92	73.3	12.9	62.2	72.2	36.3	23.9	76.3	29.2	54.7	45.7	68.3	98.6	84.9	61	52.6	66.4	65.2	80.2
linear_probe	ViT-B/32	OpenCLIP	68.6	91.2	91.3	72	14.4	68.9	76.9	45.9	31.2	81.4	65.1	52.9	46.7	86	94	87.9	65.9	54.7	79.1	83	84.5
linear_probe	ViT-B/16	CLIP	68.3	91.3	91.4	71.1	21.7	61.6	76.7	53.6	36	89.7	55.9	58	44.8	76.7	94.2	90.5	54.3	62	78.3	73.6	84.2
linear_probe	ViT-B/16	DeiT	54.1	86.2	70.1	61.5	4.4	52.9	62.5	14.5	24.1	41.9	46.7	51.1	47.6	83.8	82.7	87.8	51.5	50.1	63.4	27.7	70.9
linear_probe	ViT-B/16	MAE	33.4	59	34	21.2	2.8	35	64.4	21.3	7	7.7	17.5	51.4	46.1	63.4	50.9	17.2	54.9	50.1	38.9	6.3	18.3
linear_probe	ViT-B/16	MoCo-v3	50.2	80.8	78.5	60.5	4.8	57.1	77.1	20.5	11.8	36.6	31.4	50.7	46.7	64.1	79.5	76.3	54.7	50.1	61.1	13.4	47.9
linear_probe	ViT-B/16	OpenCLIP	69.7	93.2	91.6	72.7	18.1	69.4	79.7	46.3	34.3	84	64.1	53.4	38.7	92.9	95	88.2	66.3	57.4	78.5	86	85
linear_probe	ViT-B/16	scratch	19.6	9	17.6	5.8	1.2	8.2	41	15.4	3	2.7	7.9	49.6	40.9	26.7	17.8	4.1	52.7	51.5	18.6	1.5	17.5
linear_probe	ViT-B/16	ViT	57.6	93.2	88.2	75.4	6.8	63.9	70	25.2	22.7	59	29.9	48.5	46.6	68.3	99.2	89.6	61.3	49.9	57.9	27.6	69.2
linear_probe	ViT-L/14	OpenCLIP	72.5	92.9	94.1	78.8	22.6	72	86	52.9	40.1	89.2	74.2	54.7	41.1	86.4	97.2	91.6	60.2	58.8	83.3	89.3	84.9
linear_probe	ViT-L/14 (336px)	CLIP	75.2	94.5	95.4	79.3	34.2	70	87	58.4	50.1	93.8	74.2	59.8	35	83	98	94.2	65.8	71.4	87.8	85.7	86.5
linear_probe	Swin-T	K-Lite	55	88.4	84	65.5	4.6	54.8	67.2	22.1	26.8	52	34.9	55.4	46.4	68	97.6	59.5	61	50.7	63.5	22.2	74.5
linear_probe	Swin-T	UniCL	54.3	87.6	86.8	62.7	4.7	53.6	70.1	22.9	17.8	45.7	35.1	48.6	51	68.7	92.4	69.8	57.3	51.7	61.6	22.3	75.8

## Sheet: full_shot
Mode	Backbone	Pretrain	Average	Caltech101	CIFAR10	CIFAR100	Country211	DTD	EuroSat	FER2013	FGVCAircraft	Food101	GTSRB	HatefulMemes	KittiDistance	MNIST	Flowers102	OxfordPets	PatchCamelyon	SST2	RESISC45	StanfordCars	VOC2007
finetuning	ViT-B/32	CLIP	80.4	94	97.8	87	19.1	70.1	98.1	68.9	50.7	87.7	98.6	61.9	81	99.5	88.5	91.6	91	70.6	89.4	75.8	85.7
finetuning	ViT-B/16	CLIP	83.6	94.9	98.6	89.4	23.6	74.7	98.4	72	60.8	91.8	99	65.9	84.1	99.6	94.1	94.2	89.7	76.6	91.9	86.9	86.5
finetuning	ViT-B/16	DeiT	79.6	94.9	98.2	89.6	14.1	72.8	98.2	69.3	59.2	84.5	98.8	44.3	82	99.6	92.4	93.9	89.9	52.6	90.8	83	83.1
finetuning	ViT-B/16	MAE	74.4	92.8	97.7	85.5	9.3	66.2	97.5	68.5	46.2	84.6	99.1	55.2	82.8	99.6	75.3	89.8	76	56.7	87	47	71.7
finetuning	ViT-B/16	MoCo-v3	77.7	93.3	98.1	88.7	11.7	71.3	97.3	68.4	51.9	84.1	98.8	54.5	80.5	99.6	87.1	90.9	91.4	52.6	88.6	67.9	77.6
finetuning	ViT-B/16	scratch	43.7	28.3	65.9	41.4	4	21.8	85.3	41	7.2	34	83	55.7	50.5	95.6	35.1	15.3	81.8	55.6	44.5	2.6	26.1
finetuning	ViT-B/16	ViT	82	96.6	99	93.4	16.8	79.4	98.3	72.6	61.9	90.7	99.1	53.4	84.5	99.7	99.5	94	91.1	50.1	91.5	83.3	85.6
finetuning	Swin-T	K-Lite	78.1	94.4	95.7	88.3	10.5	70.4	97.8	66.1	62.2	85.9	98.2	56.1	79.6	99.7	98.1	87.2	72.2	56.8	88.9	72.5	80.4
finetuning	Swin-T	UniCL	78.5	93.3	97.3	87.4	11.6	70.3	97.5	63.4	59.1	85.8	98.4	56.9	81.5	99.5	93.5	88.5	87.3	55.1	88.8	73.6	80.7
linear_probe	ViT-B/32	CLIP	78.4	86	95.1	79.8	25.9	75.3	93.8	67.8	44.7	88.6	86.9	63.1	65.8	98.8	94.5	91	83.2	71.6	88.1	82.1	86
linear_probe	ViT-B/16	CLIP	81.2	94.4	95.8	82.2	31.2	77.4	94.5	68.5	52.8	92.8	88.6	65.1	67.7	98.9	96.5	94	83.5	74.5	90.9	87.2	87
linear_probe	ViT-B/16	DeiT	79.6	94.9	98.2	89.6	14.1	72.8	98.2	69.3	59.3	84.5	98.8	44.3	82	99.6	92.4	93.9	89.9	52.6	90.8	83	83.1
linear_probe	ViT-B/16	MAE	68.7	87.7	88.2	68.3	10.1	66.3	94.8	56	39.2	65.1	76.3	56.2	78.8	99.3	72	81.6	86	58.4	81.2	37.2	71.4
linear_probe	ViT-B/16	MoCo-v3	74.9	92.1	96.9	85.3	13.7	73.1	95.9	60.1	48	78	78.7	53.7	68.8	98.4	89.5	91.4	86.7	57.1	86.3	63	81.7
linear_probe	ViT-B/16	scratch	31.6	16.5	43	18.7	3.1	13.8	69	30.4	4.4	10.9	15.3	56.6	45.2	85	21.7	9.5	77.6	55	31	2.7	23.3
linear_probe	ViT-B/16	ViT	77.6	95.9	98.2	89.8	16.7	78.9	96	64.5	47.8	89.6	76.5	55.1	69.3	98.2	99.2	94.8	85.5	54.6	86.6	67.5	87.3
linear_probe	Swin-T	K-Lite	74.5	93.3	94.1	81.4	12.1	73.8	94.8	58.8	48.1	82.2	78.4	56.7	74.7	98.6	99	80.8	86	53.3	84	56.8	82.6
linear_probe	Swin-T	UniCL	74.8	92.7	94.2	81.1	12.6	73.5	95	57.1	48.9	82.3	80.7	57	74.8	98.4	99	85	85.8	54	83.9	56.9	82.1
